# Supplementary material for: Developing erythromycin resistance gene by heavy metals, Pb, Zn, and Co, in aquatic ecosystems
Source: PubMed Central journal article supplement (PMC9718742; doi:10.1038/s41598-022-25272-5), 2022-12-02
Supplement: 41598_2022_25272_MOESM1_ESM.pdf [file 41598_2022_25272_MOESM1_ESM.pdf]

| Place-name                              | Country                          | Concentration of Pb and Zn (mg/L) | Reference |
|-----------------------------------------|----------------------------------|-----------------------------------|-----------|
| Skadar Lake                             | border of Montenegro and Albania | <0.005, 0.004                     | 24        |
| Nile River (winter)                     | Egypt (Cairo)                    | 0.105, 0.139                      | 23        |
| Tishgo River                            | Peru                             | 0.028, 0.060                      | 21        |
| Lake Manzala                            | Egypt                            | 0.022, 0.311                      | 19        |
| Old Brahmaputra River                   | Bangladesh                       | 0.11, 0.01                        | 20        |
| Uglješnica River                        | Serbia                           | 0.582, 0.346                      | 27        |
| surface water of the Tianshan Mountains | China                            | 0.045, 0.689                      | 35        |
| Yi River                                | China                            | 0.0004, 0.0009                    | 25        |
| Çeltek Pond                             | Turkey                           | 0.0027, 0.054                     | 29        |
| Kowalskie Lake reservoir                | Poland                           | 0.0012, 0.014                     | 31        |
| Groundwater of Kohistan region          | Pakistan                         | 0.0096, 0.951                     | 28        |
| surface water of Kohistan region        | Pakistan                         | 0.005, 0.034                      | 28        |
| Yelang Lake                             | China                            | 0.0003, 0.0006                    | 34        |
| Lake Muhazi                             | Rwanda                           | 0.292, 0.041                      | 30        |
| Luvuvhu River                           | South Africa                     | 0.0001, 0.0082                    | 26        |
| Bohai Region                            | China                            | 0.001, 0.03                       | 33        |
| Nzhelele River                          | South Africa                     | 0.0078, 0.076                     | 22        |
| lower São Francisco River basin         | Brazil                           | 0.014, 0.013                      | 32        |

**Supplementary Table S1.** Concentration of two heavy metals, Pb and Zn, in the water of various aquatic ecosystems around the world.
